## The main etiological reasons of fatal type 2 myocardial infarction

Leonova I.; Oblavatsky D.; Boldueva S.

North-Western State Medical University named after I.I. Mechnikov, Saint Petersburg, Russian Federation

**Funding Acknowledgements:** Type of funding sources: None.

**Purpose:** the assessment of the proportion of myocardial infarction (MI) type 2 in the structure of mortality in a multidisciplinary hospital

**Material and methods.** A retrospective study was made of 1,574 autopsy protocols carried out in a multidisciplinary hospital in the period from 01.01.10 to 31.12.16, of which a group with postmortem type II MI was identified. The control group was composed of persons who died from proven atherothrombotic type 1 MI

**Results.** In 360 cases (22.87%), the cause of death was MI. Of these, 137 cases were due to type 2 MI. The ratio of men and women was the same. Type 2 MI more often developed in elderly (48.2%) and senile (34.3%) ages; the average age of patients with type 2 MI was  $71.7 \pm$  years ( $68.2 \pm 3$  years among men and  $75.3 \pm 4$  years among women  $p < 0.05$ ), which did not differ from the group with fatal type 1 MI. The main causes of death in type 2 MI were tachysystolic arrhythmias - 59.12% of cases, severe hypoxia of any etiology - 35.04%. The absence of significant stenoses of coronary artery (CA) is significantly more common in type 2 MI, and multivessel disease - in type 1 MI. In the group of patients with type 1 MI, 67.29% had multivessel lesions (Table 1).

When comparing mortality in different departments of a multidisciplinary hospital, it turned out that only 29.2% of patients with type 2 MI were initially hospitalized in the cardiology department; 45.3% of patients - therapeutic, 25.5% of patients – surgical.

**Conclusion.** Nearly one in four patients die as a result of MI, with more than 1/3 of fatal MIs occurring in type 2 MI. The main reasons for the development of type 2 MI: tachysystolic arrhythmias - 59.12%, hypoxia of various origins - 35.04%, sepsis - 2.2%. 25% of fatal type 2 MIs occurred in surgical patients.

Table 1. CA in type 1 and 2 MI

| Sign                           | Type 1 MY n = 223 | Type 2 MY n = 137 | p     |
|--------------------------------|-------------------|-------------------|-------|
| No significant stenosis        | 2,24%             | 32,85%            | 0,001 |
| Single CA significant stenosis | 8,07%             | 12,41%            | 0,193 |
| 2-CA significant stenosis      | 23,3%             | 23,36%            | 0,272 |
| Multivessel stenosis           | 66,4%             | 31,38%            | 0,005 |
| Occlusion of at least one CA   | 48,9%             | 4,38%             | 0,001 |
